# Supplementary material for: Liver failure as the initial presentation in cancer of unknown primary: a case report
Source: Springer Nature journal article supplement (doi:10.1186/s12879-023-08274-0), 2023-05-30
Supplement: MOESM1 [file 25423452]

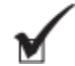

| Topic                           | Item | Checklist item description                                                                                      | Reported on Line                                                    |
|---------------------------------|------|-----------------------------------------------------------------------------------------------------------------|---------------------------------------------------------------------|
| <b>Title</b>                    | 1    | The diagnosis or intervention of primary focus followed by the words “case report” . . . . .                    | Title, page1                                                        |
| <b>Key Words</b>                | 2    | 2 to 5 key words that identify diagnoses or interventions in this case report, including "case report" . . .    | Key words, page2                                                    |
| <b>Abstract (no references)</b> | 3a   | Introduction: What is unique about this case and what does it add to the scientific literature? . . . . .       | Abstract, page2                                                     |
|                                 | 3b   | Main symptoms and/or important clinical findings . . . . .                                                      | Abstract, page2                                                     |
|                                 | 3c   | The main diagnoses, therapeutic interventions, and outcomes . . . . .                                           | Abstract ,page2                                                     |
|                                 | 3d   | Conclusion—What is the main “take-away” lesson(s) from this case? . . . . .                                     | Abstract ,page2                                                     |
| <b>Introduction</b>             | 4    | One or two paragraphs summarizing why this case is unique ( <b>may include references</b> ) . . . . .           | Introduction, page3                                                 |
| <b>Patient Information</b>      | 5a   | De-identified patient specific information. . . . .                                                             | Case presentation, paragraph 1                                      |
|                                 | 5b   | Primary concerns and symptoms of the patient. . . . .                                                           | Case presentation, paragraph 1                                      |
|                                 | 5c   | Medical, family, and psycho-social history including relevant genetic information . . . . .                     | Case presentation, paragraph 2                                      |
|                                 | 5d   | Relevant past interventions with outcomes . . . . .                                                             | Case presentation, paragraph1                                       |
| <b>Clinical Findings</b>        | 6    | Describe significant physical examination (PE) and important clinical findings. . . . .                         | Case presentation, paragraph1- 4                                    |
| <b>Timeline</b>                 | 7    | Historical and current information from this episode of care organized as a timeline . . . . .                  | Not applicable                                                      |
| <b>Diagnostic Assessment</b>    | 8a   | Diagnostic testing (such as PE, laboratory testing, imaging, surveys). . . . .                                  | Case presentation, paragraph 1- 4                                   |
|                                 | 8b   | Diagnostic challenges (such as access to testing, financial, or cultural) . . . . .                             | Case presentation, paragraph 5                                      |
|                                 | 8c   | Diagnosis (including other diagnoses considered) . . . . .                                                      | Case presentation, paragraph 5                                      |
|                                 | 8d   | Prognosis (such as staging in oncology) where applicable . . . . .                                              | Not applicable                                                      |
| <b>Therapeutic Intervention</b> | 9a   | Types of therapeutic intervention (such as pharmacologic, surgical, preventive, self-care) . . . . .            | Case presentation, paragraph 5                                      |
|                                 | 9b   | Administration of therapeutic intervention (such as dosage, strength, duration) . . . . .                       | Not applicable                                                      |
|                                 | 9c   | Changes in therapeutic intervention (with rationale) . . . . .                                                  | Case presentation, paragraph 5                                      |
| <b>Follow-up and Outcomes</b>   | 10a  | Clinician and patient-assessed outcomes (if available) . . . . .                                                | Not applicable                                                      |
|                                 | 10b  | Important follow-up diagnostic and other test results . . . . .                                                 | Not applicable                                                      |
|                                 | 10c  | Intervention adherence and tolerability (How was this assessed?) . . . . .                                      | Not applicable                                                      |
|                                 | 10d  | Adverse and unanticipated events . . . . .                                                                      | Case presentation, paragraph 5                                      |
| <b>Discussion</b>               | 11a  | A scientific discussion of the strengths AND limitations associated with this case report . . . . .             | Not applicable                                                      |
|                                 | 11b  | Discussion of the relevant medical literature <b>with references</b> . . . . .                                  | Discussion and conclusion Paragraph1- 3                             |
|                                 | 11c  | The scientific rationale for any conclusions (including assessment of possible causes) . . . . .                | Discussion and conclusion Paragraph1- 3                             |
|                                 | 11d  | The primary “take-away” lessons of this case report (without references) in a one paragraph conclusion . .      | Discussion and conclusion Paragraph4                                |
| <b>Patient Perspective</b>      |      |                                                                                                                 |                                                                     |
| <b>Informed Consent</b>         | 12   | The patient should share their perspective in one to two paragraphs on the treatment(s) they received . . . . . | Not applicable                                                      |
|                                 | 13   | Did the patient give informed consent? Please provide if requested . . . . .                                    | Yes <input type="checkbox"/> No <input checked="" type="checkbox"/> |
