# Supplementary material for: Liver failure as the initial presentation in cancer of unknown primary: a case report
Source: Springer Nature journal article supplement (doi:10.1186/s12879-023-08274-0), 2023-05-30
Supplement: MOESM2 [file 25423452]

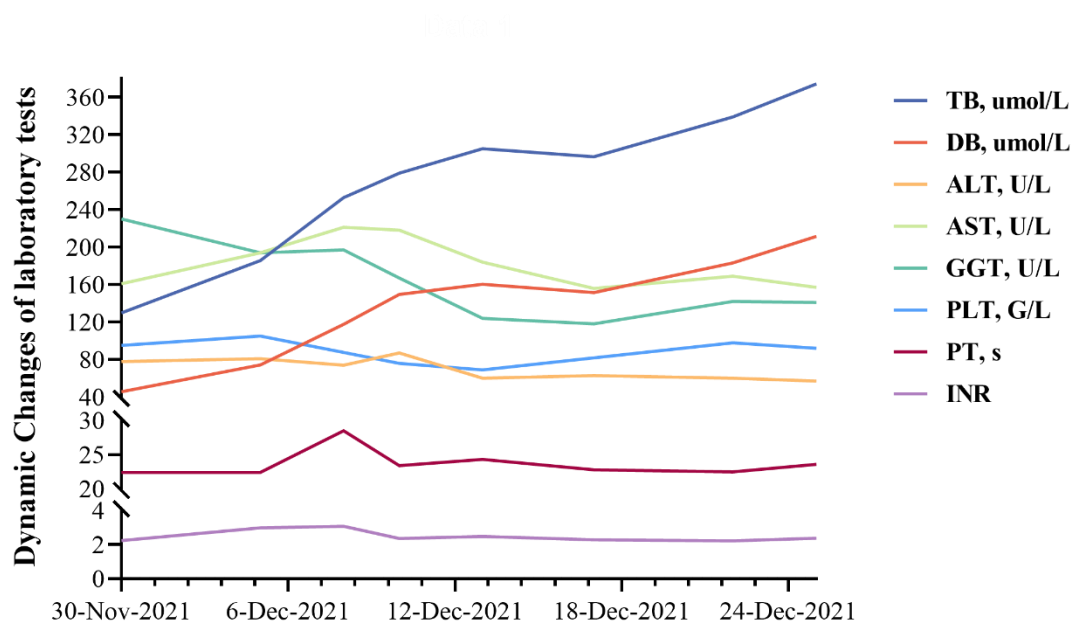

**Figure S1. Dynamic changes of laboratory tests.**

PLT: platelets, TB: total bilirubin, DB: direct bilirubin, ALT: alanine aminotransferases, AST: aspartate aminotransferase, PT: prothrombin time, INR: international normalized ratio.
