# Supplementary material for: Liver failure as the initial presentation in cancer of unknown primary: a case report
Source: Springer Nature journal article supplement (doi:10.1186/s12879-023-08274-0), 2023-05-30
Supplement: MOESM3 [file 25423452]

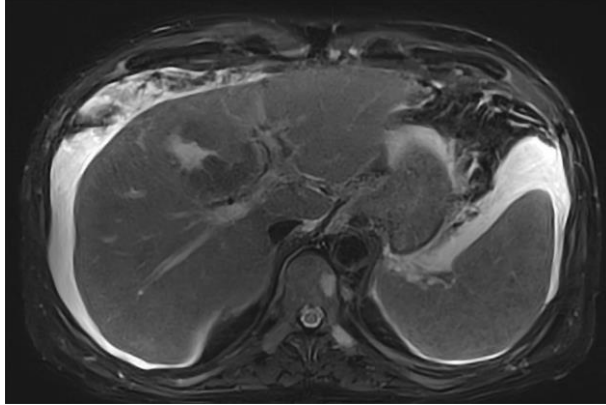

**Figure S2. Magnetic resonance imaging (MRI) of the Liver.**

The results revealed a diffuse decreased uptake of the liver parenchyma.
