# Supplementary material for: Liver failure as the initial presentation in cancer of unknown primary: a case report
Source: Springer Nature journal article supplement (doi:10.1186/s12879-023-08274-0), 2023-05-30
Supplement: MOESM4 [file 25423452]

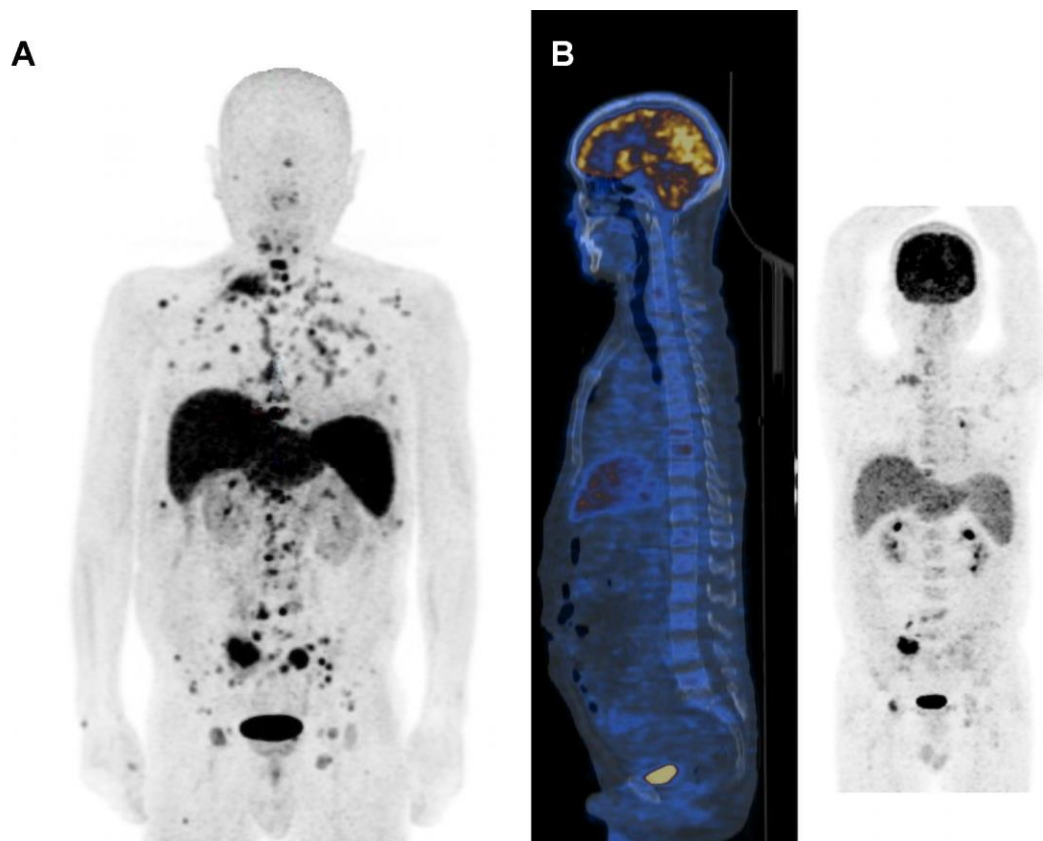

**Figure S3. The  $^{68}\text{Ga}$ -FAPI PET and  $^{18}\text{F}$ FDG-PET/CT imaging.**

(A) Multiple areas of increased FAPI uptake were observed in the bone and lymph nodes, with SUVmax values of 2.5-14.6 and 8.0, respectively. These manifestations above cannot be ruled out as metastasis disease. Lymph nodes scattered in the mediastinum and the left hilar region with SUVmax 4.7-7.5 were due to lymphadenitis. In addition, diffuse FAPI uptake was detected in the liver and spleen. (B) Intensive uptake in multiple bones indicates metastatic lesions. Moreover, abnormal uptake was observed in the spleen and mediastinal lymph node.
