# Supplementary material for: Liver failure as the initial presentation in cancer of unknown primary: a case report
Source: Springer Nature journal article supplement (doi:10.1186/s12879-023-08274-0), 2023-05-30
Supplement: MOESM6 [file 25423452]

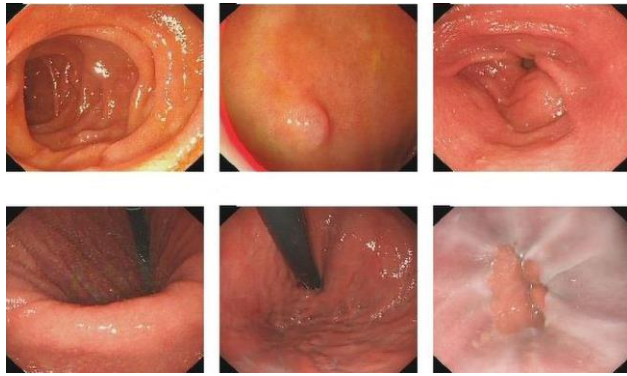

**Figure S5. Gastroscopy findings**

Upper gastrointestinal endoscopy revealed no varices in the esophagus or the gastric fundus. Meanwhile, the presence of strip redness of the gastric mucosa, diffuse redness of the gastric antrum mucosa, and polyps of the duodenal bulb were observed on endoscopy.
